# Supplementary material
Source: PubMed Central journal article supplement (PMC5210095)
Supplement: EMBR-18-150-s001.pdf [file EMBR-18-150-s001.pdf]

# APPENDIX

## Table of Contents

|        |                   |
|--------|-------------------|
| Page 2 | Appendix Table S1 |
| Page 3 | Appendix Table S2 |
| Page 5 | Appendix Table S3 |
| Page 6 | Appendix Table S4 |
| Page 9 | Appendix Table S5 |

**Appendix Table S1.** The list of primers used for PCR analyses.

| <b>Gene</b> | <b>Forward primer (5'-3')</b>   | <b>Reverse primer (5'-3')</b> |
|-------------|---------------------------------|-------------------------------|
| Nestin      | AGA CAC CTG TGC CAG CCT TTC     | CTG CTG CAA GCT GCT TAC CAC   |
| SOX2        | GCC CTG CAG TAC AAC TCC AT      | TGG AGT GGG AGG AAG AGG TA    |
| Musashi-1   | GTT TCG GCT TCG TCA CTT TC      | GAG TCA CCA TCT TGG GCT GT    |
| GFAP        | GGG ATG GAG AGG TCA TTA AGG     | GGG TGA GTT TCT TGT TAG TTG G |
| TUJ1        | TGC GTG TGT ACA GGT GAA TGC     | AGG CTG CAT AGT CAT TTC CAA G |
| NANOG       | AGC TAC AAA CAG GTG AAG AC      | CTC CAG GTT GAA TTG TTC CA    |
| Bmi1        | AAA GAT ACT TAC GAT GCC CAG     | GAA GTG GAC CAT TCC TTC TC    |
| CD133       | GAA CAA GTT TAC AGT GAC TGC     | TGC GTT GAA GTA TCT TTG ACG   |
| Olig2       | CGT CGT CCA CCA CCA AGA AGG AC  | TGT GCC TAC GGC ATG ACC TC    |
| L1CAM       | TCA CGG GCA ACA ACA GCA ACT     | CGG CTT CCT GTC AAT CAT GCT   |
| MYC         | TCA AGA GGC GAA CAC ACA AC      | GGC CTT TTC ATT GTT TTC CA    |
| OCT4        | GGT TCT ATT TGG GAA GGT ATT CAG | GGT TTC TGC TTT GCA TAT CTC   |
| i-NOS       | CCT GAG CTC TTC TTC GAA ATC C   | AGG ATG TTG TAG CGC TGG AC    |
| VEGF        | TAC CTC CAC CAT GCC AAG TG      | AAG ATG TCC ACC AGG GTC TC    |
| PSMB5       | ACT TCC CTT ACG CAA CAT GG      | GCC TAG CAG GTA TGG GTT GA    |
| PSMB6       | GGC GGA CTC CAG AAC AAC C       | CCA GTG GAG GCT CAT TCA GT    |
| PSMB7       | CTG TGT CGG TGT ATG CGC CA      | GCA ACA ACC ATC CCT TCA GT    |

**Appendix Table S2.** Microarray data. Fold change (greater than two-fold) in gene expression of GSCs treated with MG132 compared with control.

| <b>Target ID</b> | <b>Gene symbol</b> | <b>Fold change of gene expression<br/>(MG132 over control)</b> |
|------------------|--------------------|----------------------------------------------------------------|
| ILMN_2374865     | ATF3               | 30.97                                                          |
| ILMN_1811767     | INHBE              | 11.73                                                          |
| ILMN_1671791     | PCK2               | 11.69                                                          |
| ILMN_1751598     | SESN2              | 9.66                                                           |
| ILMN_2188862     | GDF15              | 9.43                                                           |
| ILMN_1800512     | HMOX1              | 9.23                                                           |
| ILMN_1796417     | ASNS               | 8.80                                                           |
| ILMN_1702933     | ADM2               | 8.58                                                           |
| ILMN_1795963     | OKL38              | 8.13                                                           |
| ILMN_2398107     | ASNS               | 8.09                                                           |
| ILMN_1775304     | DNAJB1             | 7.45                                                           |
| ILMN_1787815     | TRIB3              | 7.35                                                           |
| ILMN_2137789     | KLF4               | 7.13                                                           |
| ILMN_1739423     | RN7SK              | 7.09                                                           |
| ILMN_1738407     | ULBP1              | 6.58                                                           |
| ILMN_1676984     | DDIT3              | 6.55                                                           |
| ILMN_1658383     | HSPA6              | 6.55                                                           |
| ILMN_2110908     | MYC                | 6.35                                                           |
| ILMN_2358457     | ATF4               | 6.01                                                           |
| ILMN_1659936     | PPP1R15A           | 5.56                                                           |
| ILMN_2390310     | C17orf91           | 5.53                                                           |
| ILMN_1801122     | LOC401317          | 5.53                                                           |
| ILMN_2319588     | OSGIN1             | 5.49                                                           |
| ILMN_1806165     | HSPA6              | 5.28                                                           |
| ILMN_3210914     | LOC344887          | 5.12                                                           |
| ILMN_2134888     | TUBE1              | 5.02                                                           |

**Appendix Table S2.** Continued.

| <b>Target ID</b> | <b>Gene symbol</b> | <b>Fold change of gene expression<br/>(MG132 over control)</b> |
|------------------|--------------------|----------------------------------------------------------------|
| ILMN_2374164     | HERPUD1            | 4.92                                                           |
| ILMN_2374159     | HERPUD1            | 4.92                                                           |
| ILMN_1655229     | SLC7A11            | 4.85                                                           |
| ILMN_1813019     | DNAJB4             | 4.79                                                           |
| ILMN_1661599     | DDIT4              | 4.74                                                           |
| ILMN_1660436     | HSPA1B             | 4.69                                                           |
| ILMN_1694671     | ZFAND2A            | 4.54                                                           |
| ILMN_1748124     | TSC22D3            | 4.43                                                           |
| ILMN_2074860     | RN7SK              | 4.38                                                           |
| ILMN_1680618     | MYC                | 4.35                                                           |
| ILMN_1691884     | STC2               | 4.33                                                           |
| ILMN_2222317     | DNAJB4             | 4.25                                                           |
| ILMN_1779857     | KLF4               | 4.10                                                           |
| ILMN_2376403     | TSC22D3            | 4.19                                                           |
| ILMN_2181892     | BEX2               | 4.06                                                           |
| ILMN_2305112     | CTH                | 4.05                                                           |
| ILMN_1788547     | GCLM               | 4.02                                                           |
| ILMN_1684158     | GPT2               | 4.01                                                           |
| ILMN_1711894     | MYB                | -3.14                                                          |
| ILMN_2111237     | MN1                | -3.17                                                          |
| ILMN_3256478     | LOC100129034       | -3.34                                                          |
| ILMN_1685608     | NPTX2              | -3.80                                                          |
| ILMN_1743367     | FZD4               | -3.83                                                          |
| ILMN_1778755     | TRIL               | -4.23                                                          |
| ILMN_1773117     | BCOR               | -4.24                                                          |
| ILMN_1794803     | NDP                | -4.64                                                          |
| ILMN_1663080     | LFNG               | -4.68                                                          |

**Appendix Table S3.** Microarray data. Fold change (greater than two-fold) in gene expression of DFCs treated with MG132 compared with control.

| <b>Target ID</b> | <b>Gene symbol</b> | <b>Fold change of gene expression<br/>(MG132 over control)</b> |
|------------------|--------------------|----------------------------------------------------------------|
| ILMN_2374865     | ATF3               | 5.27                                                           |
| ILMN_2374159     | HERPUD1            | 4.44                                                           |
| ILMN_1795963     | OKL38              | 4.33                                                           |
| ILMN_1806165     | HSPA6              | 4.24                                                           |
| ILMN_1694671     | ZFAND2A            | 4.15                                                           |
| ILMN_1660436     | HSPA1B             | 4.04                                                           |
| ILMN_2319588     | OSGIN1             | 3.92                                                           |
| ILMN_2374164     | HERPUD1            | 3.79                                                           |
| ILMN_1665554     | BRF2               | 3.63                                                           |
| ILMN_1813019     | DNAJB4             | 3.47                                                           |
| ILMN_1703684     | NAP1L2             | 3.46                                                           |
| ILMN_2390310     | C17orf91           | 3.34                                                           |
| ILMN_1800512     | HMOX1              | 3.22                                                           |
| ILMN_1775304     | DNAJB1             | 3.21                                                           |
| ILMN_1658383     | HSPA6              | 3.20                                                           |
| ILMN_1676984     | DDIT3              | 3.10                                                           |
| ILMN_1753490     | C10orf39           | 3.10                                                           |
| ILMN_1804822     | SRXN1              | 3.09                                                           |
| ILMN_1773742     | DNAJB9             | 3.08                                                           |
| ILMN_2222317     | DNAJB4             | 3.05                                                           |
| ILMN_1746633     | C9orf25            | 3.01                                                           |
| ILMN_1652072     | MGC42105           | -2.54                                                          |
| ILMN_1767556     | C10orf10           | -2.67                                                          |
| ILMN_1794803     | NDP                | -2.77                                                          |
| ILMN_1740426     | RASD1              | -2.78                                                          |
| ILMN_1663080     | LFNG               | -2.85                                                          |
| ILMN_2340259     | PDE4B              | -2.85                                                          |
| ILMN_1691860     | SPRY1              | -3.24                                                          |
| ILMN_2329914     | SPRY1              | -3.99                                                          |
| ILMN_1773117     | BCOR               | -4.07                                                          |

**Appendix Table S4.** Microarray data. Fold change difference (greater than two-fold difference) in gene expression between GSCs and DFCs treated with MG132.

| Target ID    | Gene symbol | Fold change<br>in GSCs<br>(MG132 / ctrl) | Fold change<br>in DFCs<br>(MG132 / ctrl) | Fold change<br>difference<br>(GSCs - DFCs) |
|--------------|-------------|------------------------------------------|------------------------------------------|--------------------------------------------|
| ILMN_2374865 | ATF3        | 30.97                                    | 5.27                                     | 25.70                                      |
| ILMN_1671791 | PCK2        | 11.69                                    | 1.39                                     | 10.30                                      |
| ILMN_1811767 | INHBE       | 11.73                                    | 2.61                                     | 9.12                                       |
| ILMN_1751598 | SESN2       | 9.66                                     | 1.91                                     | 7.75                                       |
| ILMN_2188862 | GDF15       | 9.43                                     | 2.14                                     | 7.29                                       |
| ILMN_1702933 | ADM2        | 8.58                                     | 2.52                                     | 6.05                                       |
| ILMN_1661599 | DDIT4       | 4.74                                     | -1.30                                    | 6.04                                       |
| ILMN_1800512 | HMOX1       | 9.23                                     | 3.22                                     | 6.01                                       |
| ILMN_1796417 | ASNS        | 8.80                                     | 2.81                                     | 5.99                                       |
| ILMN_2137789 | KLF4        | 7.13                                     | 1.16                                     | 5.97                                       |
| ILMN_2398107 | ASNS        | 8.09                                     | 2.25                                     | 5.84                                       |
| ILMN_2376403 | TSC22D3     | 4.19                                     | -1.55                                    | 5.73                                       |
| ILMN_1748124 | TSC22D3     | 4.43                                     | -1.30                                    | 5.73                                       |
| ILMN_1707312 | NFIL3       | 4.00                                     | -1.12                                    | 5.12                                       |
| ILMN_1739423 | RN7SK       | 7.09                                     | 2.07                                     | 5.01                                       |
| ILMN_1738407 | ULBP1       | 6.58                                     | 1.62                                     | 4.96                                       |
| ILMN_1787815 | TRIB3       | 7.35                                     | 2.44                                     | 4.91                                       |
| ILMN_1802205 | RHOB        | 3.04                                     | -1.29                                    | 4.33                                       |
| ILMN_1656369 | C8orf4      | 2.90                                     | -1.43                                    | 4.33                                       |
| ILMN_1775304 | DNAJB1      | 7.45                                     | 3.21                                     | 4.24                                       |
| ILMN_1651799 | SLC38A2     | 3.20                                     | -1.03                                    | 4.23                                       |
| ILMN_1740426 | RASD1       | 1.39                                     | -2.78                                    | 4.18                                       |
| ILMN_2375879 | VEGFA       | 2.98                                     | -1.17                                    | 4.15                                       |
| ILMN_1775380 | SMOX        | 3.10                                     | -1.02                                    | 4.12                                       |
| ILMN_1778523 | KLF9        | 1.82                                     | -2.20                                    | 4.02                                       |
| ILMN_2261076 | NEDD9       | 2.52                                     | -1.39                                    | 3.91                                       |
| ILMN_1801122 | LOC401317   | 5.53                                     | 1.66                                     | 3.87                                       |
| ILMN_2048388 | ZNF643      | 2.79                                     | -1.05                                    | 3.84                                       |

**Appendix Table S4.** Continued.

| <b>Target ID</b> | <b>Gene symbol</b> | <b>Fold change<br/>in GSCs<br/>(MG132 / ctrl)</b> | <b>Fold change<br/>in DFCs<br/>(MG132 / ctrl)</b> | <b>Fold change<br/>difference<br/>(GSCs - DFCs)</b> |
|------------------|--------------------|---------------------------------------------------|---------------------------------------------------|-----------------------------------------------------|
| ILMN_1795963     | OKL38              | 8.13                                              | 4.33                                              | 3.80                                                |
| ILMN_1659936     | PPP1R15A           | 5.56                                              | 1.78                                              | 3.78                                                |
| ILMN_1665510     | ERRFI1             | 2.51                                              | -1.20                                             | 3.71                                                |
| ILMN_2134888     | TUBE1              | 5.02                                              | 1.38                                              | 3.64                                                |
| ILMN_1697448     | TXNIP              | 1.43                                              | -2.16                                             | 3.59                                                |
| ILMN_1803882     | VEGFA              | 2.30                                              | -1.28                                             | 3.58                                                |
| ILMN_1757129     | TMEM88             | 2.52                                              | -1.07                                             | 3.58                                                |
| ILMN_2063584     | CLIC4              | 2.50                                              | -1.02                                             | 3.52                                                |
| ILMN_2197365     | RGS2               | 2.30                                              | -1.22                                             | 3.52                                                |
| ILMN_1680390     | GCNT2              | -2.20                                             | 1.27                                              | 3.47                                                |
| ILMN_1676984     | DDIT3              | 6.55                                              | 3.10                                              | 3.45                                                |
| ILMN_1758281     | CALCRL             | 2.17                                              | -1.22                                             | 3.40                                                |
| ILMN_1738095     | PER2               | 2.28                                              | -1.11                                             | 3.39                                                |
| ILMN_2110908     | MYC                | 6.35                                              | 2.97                                              | 3.39                                                |
| ILMN_2358457     | ATF4               | 6.01                                              | 2.64                                              | 3.37                                                |
| ILMN_1658383     | HSPA6              | 6.55                                              | 3.20                                              | 3.35                                                |
| ILMN_1731714     | CREB5              | 2.22                                              | -1.13                                             | 3.34                                                |
| ILMN_1733579     | EVI2A              | 1.27                                              | -2.06                                             | 3.34                                                |
| ILMN_1719695     | NFKBIZ             | 2.06                                              | -1.26                                             | 3.32                                                |
| ILMN_1700257     | C4orf32            | 2.08                                              | -1.20                                             | 3.29                                                |
| ILMN_1687768     | NCOA7              | 2.23                                              | -1.04                                             | 3.27                                                |
| ILMN_1789244     | SOX8               | -2.08                                             | 1.16                                              | 3.24                                                |
| ILMN_1669605     | LOC646609          | 2.19                                              | -1.03                                             | 3.21                                                |
| ILMN_2154836     | BTG3               | 2.15                                              | -1.04                                             | 3.19                                                |
| ILMN_3246214     | B3GNT1             | -2.03                                             | 1.12                                              | 3.15                                                |
| ILMN_1691884     | STC2               | 4.33                                              | 1.21                                              | 3.13                                                |
| ILMN_2400644     | SRGAP3             | -2.11                                             | 1.01                                              | 3.11                                                |
| ILMN_3225244     | TSEN15             | 2.10                                              | -1.01                                             | 3.11                                                |

**Appendix Table S4.** Continued.

| <b>Target ID</b> | <b>Gene symbol</b> | <b>Fold change<br/>in GSCs<br/>(MG132 / ctrl)</b> | <b>Fold change<br/>in DFCs<br/>(MG132 / ctrl)</b> | <b>Fold change<br/>difference<br/>(GSCs - DFCs)</b> |
|------------------|--------------------|---------------------------------------------------|---------------------------------------------------|-----------------------------------------------------|
| ILMN_2184612     | C3orf52            | -1.10                                             | 2.01                                              | 3.11                                                |
| ILMN_1752810     | LARP6              | 2.09                                              | -1.01                                             | 3.10                                                |
| ILMN_2207562     | C4orf16            | 2.01                                              | -1.09                                             | 3.10                                                |
| ILMN_1811616     | EEPD1              | -2.07                                             | 1.03                                              | 3.09                                                |
| ILMN_1712112     | RCAN1              | 1.06                                              | -2.00                                             | 3.07                                                |
| ILMN_1779857     | KLF4               | 4.19                                              | 1.14                                              | 3.05                                                |
| ILMN_3210914     | LOC344887          | 5.12                                              | 2.15                                              | 2.97                                                |
| ILMN_1788547     | GCLM               | 4.02                                              | 1.11                                              | 2.91                                                |
| ILMN_1655229     | SLC7A11            | 4.85                                              | 1.97                                              | 2.87                                                |
| ILMN_2181892     | BEX2               | 4.06                                              | 1.22                                              | 2.85                                                |
| ILMN_1714445     | SLC6A9             | 3.77                                              | 1.14                                              | 2.63                                                |
| ILMN_2074860     | RN7SK              | 4.38                                              | 1.79                                              | 2.59                                                |
| ILMN_1747205     | JDP2               | 3.84                                              | 1.28                                              | 2.56                                                |
| ILMN_1778755     | TRIL               | -4.23                                             | -1.68                                             | 2.54                                                |
| ILMN_1684158     | GPT2               | 4.01                                              | 1.58                                              | 2.43                                                |
| ILMN_1679041     | SLC3A2             | 3.99                                              | 1.71                                              | 2.28                                                |
| ILMN_2390310     | C17orf91           | 5.53                                              | 3.34                                              | 2.20                                                |
| ILMN_2367258     | SMOX               | 3.19                                              | 1.03                                              | 2.17                                                |
| ILMN_2329914     | SPRY1              | -1.84                                             | -3.99                                             | 2.15                                                |
| ILMN_2147114     | PSPH               | 3.36                                              | 1.24                                              | 2.11                                                |
| ILMN_3242462     | UHRF1BP1           | 3.15                                              | 1.06                                              | 2.09                                                |
| ILMN_1794875     | AGPAT9             | 3.18                                              | 1.14                                              | 2.04                                                |
| ILMN_1696066     | CARS               | 3.48                                              | 1.46                                              | 2.02                                                |
| ILMN_1685608     | NPTX2              | -3.81                                             | -1.79                                             | 2.01                                                |



**Appendix Table S5.** Microarray data. Fold change in the expression of ER stress response-associated genes between GSCs and DFCs treated with MG132.

| <b>Target ID</b> | <b>Gene symbol</b> | <b>Fold change<br/>in GSCs<br/>(MG132 / ctrl)</b> | <b>Fold change<br/>in DFCs<br/>(MG132 / ctrl)</b> | <b>Fold change<br/>difference<br/>(GSCs - DFCs)</b> |
|------------------|--------------------|---------------------------------------------------|---------------------------------------------------|-----------------------------------------------------|
| ILMN_2374865     | ATF3               | 30.97                                             | 5.27                                              | 25.70                                               |
| ILMN_1661599     | DDIT4              | 4.74                                              | -1.30                                             | 6.04                                                |
| ILMN_1659936     | PPP1R15A           | 5.56                                              | 1.78                                              | 3.78                                                |
| ILMN_1787815     | TRIB3              | 7.35                                              | 2.44                                              | 4.91                                                |
| ILMN_1775304     | DNAJB1             | 7.45                                              | 3.21                                              | 4.24                                                |
| ILMN_2358457     | ATF4               | 6.01                                              | 2.64                                              | 3.37                                                |
| ILMN_2110908     | MYC                | 6.35                                              | 2.97                                              | 3.39                                                |
| ILMN_1676984     | DDIT3              | 6.55                                              | 3.10                                              | 3.45                                                |
| ILMN_2098446     | PMAIP1             | 3.37                                              | 2.03                                              | 1.34                                                |
| ILMN_1806023     | JUN                | 2.30                                              | 1.53                                              | 0.77                                                |
| ILMN_2222317     | DNAJB4             | 4.25                                              | 3.05                                              | 1.20                                                |
| ILMN_2365465     | XBP1               | 2.94                                              | 2.19                                              | 0.75                                                |
| ILMN_2374164     | HERPUD1            | 4.93                                              | 3.79                                              | 1.14                                                |
| ILMN_1773742     | DNAJB9             | 2.65                                              | 3.08                                              | -0.43                                               |
